# Supplementary material for: Spaced Hybrid TiO2/Au Nanotube Arrays with Tailored Optical Properties for Surface-Enhanced Raman Scattering
Source: PubMed Central journal article supplement — ACS Omega. 2024 Nov 21;9(49):48205–12. doi: 10.1021/acsomega.4c05485 (PMC11635504; doi:10.1021/acsomega.4c05485), 2024-11-21
Supplement: ao4c05485_si_001.pdf [file ao4c05485_si_001.pdf]

## Supporting Information

### Spaced Hybrid TiO<sub>2</sub>/Au Nanotube Arrays with Tailored Optical Properties for Surface-Enhanced Raman Scattering

Morteza Afshar,<sup>1,2</sup> Subrata Ghosh,<sup>3</sup> Luca Mascaretti,<sup>1,4,\*</sup> Štěpán Kment,<sup>1,5</sup> Carlo Spartaco Casari,<sup>3,\*</sup> and Alberto Naldoni<sup>1,6,\*</sup>

<sup>1</sup>Czech Advanced Technology and Research Institute, Regional Centre of Advanced Technologies and Materials Department, Palacký University Olomouc, Šlechtitelů 27, Olomouc 78371, Czech Republic

<sup>2</sup>Department of Physical Chemistry, Faculty of Science, Palacký University, 17. listopadu 1192/12, 779 00 Olomouc, Czech Republic

<sup>3</sup>Micro and Nanostructured Materials Laboratory (NanoLab), Department of Energy, Politecnico di Milano, Via Ponzio 34/3, Milano 20133, Italy

<sup>4</sup>Department of Laser Physics and Photonics, Faculty of Nuclear Sciences and Physical Engineering, Czech Technical University in Prague, Břehová 7, 11519 Prague, Czech Republic

<sup>5</sup>CEET, Nanotechnology Centre, VŠB-Technical University of Ostrava, 17. listopadu 2172/15, Ostrava-Poruba 708 00, Czech Republic

<sup>6</sup>Department of Chemistry and NIS Centre, University of Turin, Turin 10125, Italy

e-mail: [alberto.naldoni@unito.it](mailto:alberto.naldoni@unito.it); [carlo.casari@polimi.it](mailto:carlo.casari@polimi.it); [luca.mascaretti@upol.cz](mailto:luca.mascaretti@upol.cz)

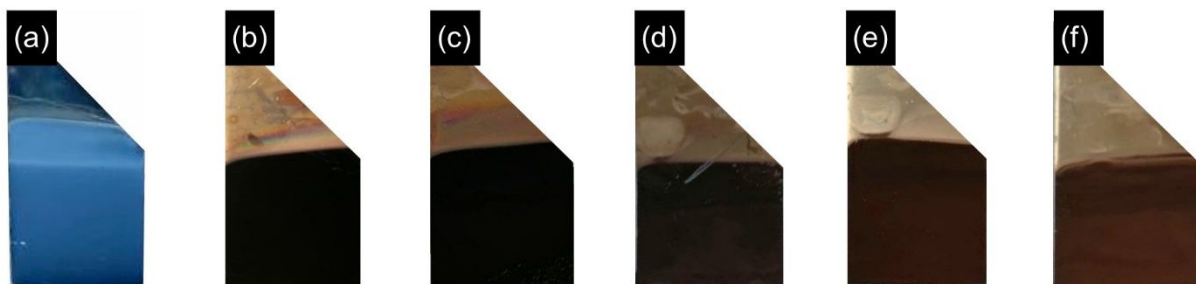

**Figure S1.** Optical photograph of (a) bare TiO<sub>2</sub> NTs and coated ones with different effective thicknesses of (b) 25, (c) 50, (d) 75, (e) 100, and (f) 125 nm Au.

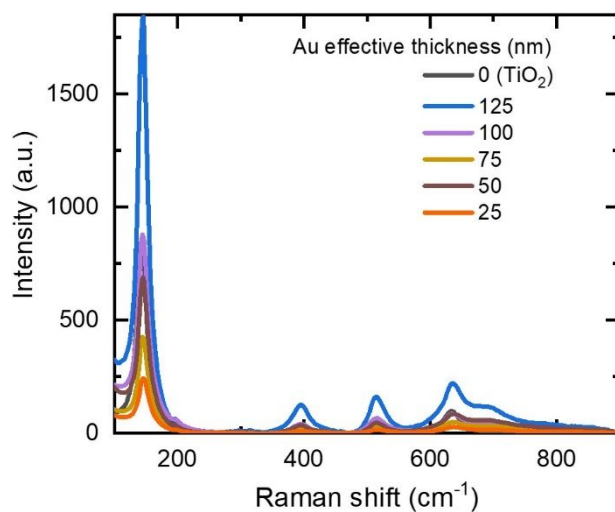

**Figure S2.** Raman spectra of bare and coated TiO<sub>2</sub> NTs using a 788 nm laser.

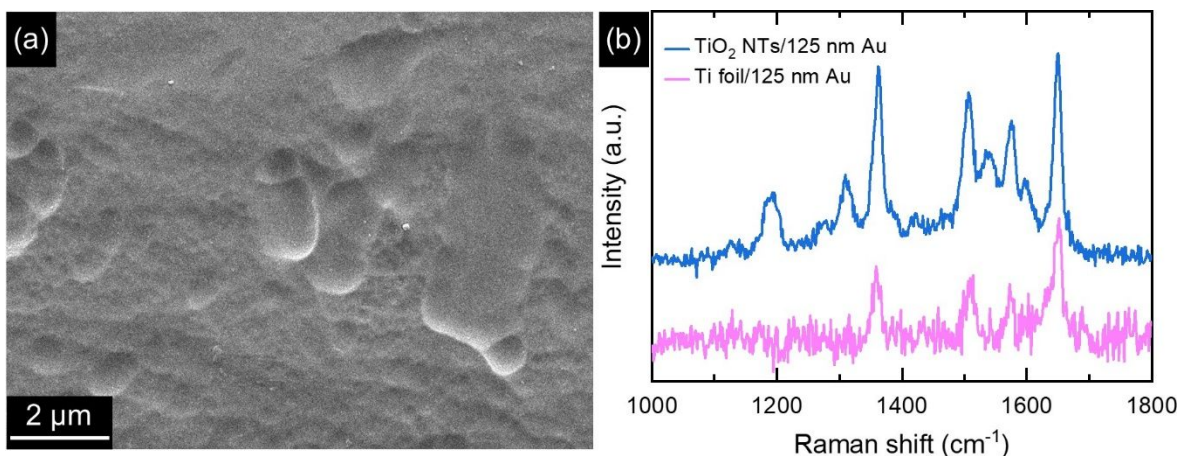

**Figure S3.** (a) SEM image of Ti foil coated with 125 nm of Au. (b) SERS spectra of 10<sup>-6</sup> M Rh6G deposited on Ti foil and TiO<sub>2</sub> NTs coated with 125 nm effective thicknesses of Au.
